# Supplementary material
Source: HighWire-hosted journal article supplement (https://ard.bmj.com/content/77/8/1150)
Supplement: inline-supplementary-material-2 [file inline-supplementary-material-2.docx]

**APPENDIX**

**Non-author investigators and members of the French Vasculitis Study Group who participated in the study:**

The authors’ full names and academic degrees are as follows: Florence Vendé, M.D., Maxime Samson, M.D., Ph.D., Pierre‑Yves Hatron, M.D., Ph.D., Abdeldjallil Koreichi, M.D., Alain Ramassamy, M.D., Hélène Francois, M.D., Ph.D., Ali Boumallassa, M.D., Anne-Bérangère Beucher, M.D., Aurélien Delluc, M.D., Ph.D., Bruno Graffin, M.D., Catherine Hanrotel-Saliou, M.D., Claire Grange, M.D., David Launay, M.D., Ph.D., Denis Bagnères, M.D., Edouard Begon, M.D., Frédéric Grassin, M.D., Frédérique Bocquentin, M.D., Guillaume Gondran, M.D., Isabelle Delacroix, M.D., Isabelle Guichard, M.D., Isabelle Marie, M.D., Ph.D., Jaques Pourrat, M.D., Ph.D., Jean-François Viallard, M.D., Ph.D., Benoit Wallaert, M.D., Ph.D., Laure Lahaxe, M.D., Laurence Vrigneaud, M.D., Marc Fabre, M.D., Marie Frimat, M.D., Marie Lino, M.D., Martine Gayraud, M.D., Matthias Buchler, M.D., Ph.D., Myriam Niel-Duriez, M.D., Nolwenn Rabot, M.D., Raphaèle Seror, M.D., Ph.D., Roderich Meckenstock, M.D., Serge Perrot, M.D., Ph.D., Serge Seiberras, M.D., Robin Dhote, M.D., Ph.D., Vincent Poindron, M.D., Virginie Rieu, M.D., Xavier Delbrel, M.D., Xavier Kyndt, M.D., Yann Ollivier, M.D.
